# Supplementary material for: Contribution of Streptococcus mutans to Helicobacter pylori colonisation in oral cavity and gastric tissue
Source: PubMed Central journal article supplement (PMC7385622; doi:10.1038/s41598-020-69368-2), 2020-07-27
Supplement: 41598_2020_69368_MOESM1_ESM.pdf [file 41598_2020_69368_MOESM1_ESM.pdf]

**Contribution of *Streptococcus mutans* to *Helicobacter pylori* colonisation in oral cavity and gastric tissue**

Ryota Nomura, Tamami Kadota, Yuko Ogaya, Saaya Matayoshi, Naoki Iwashita, Rena Okawa, Kazuhiko Nakano

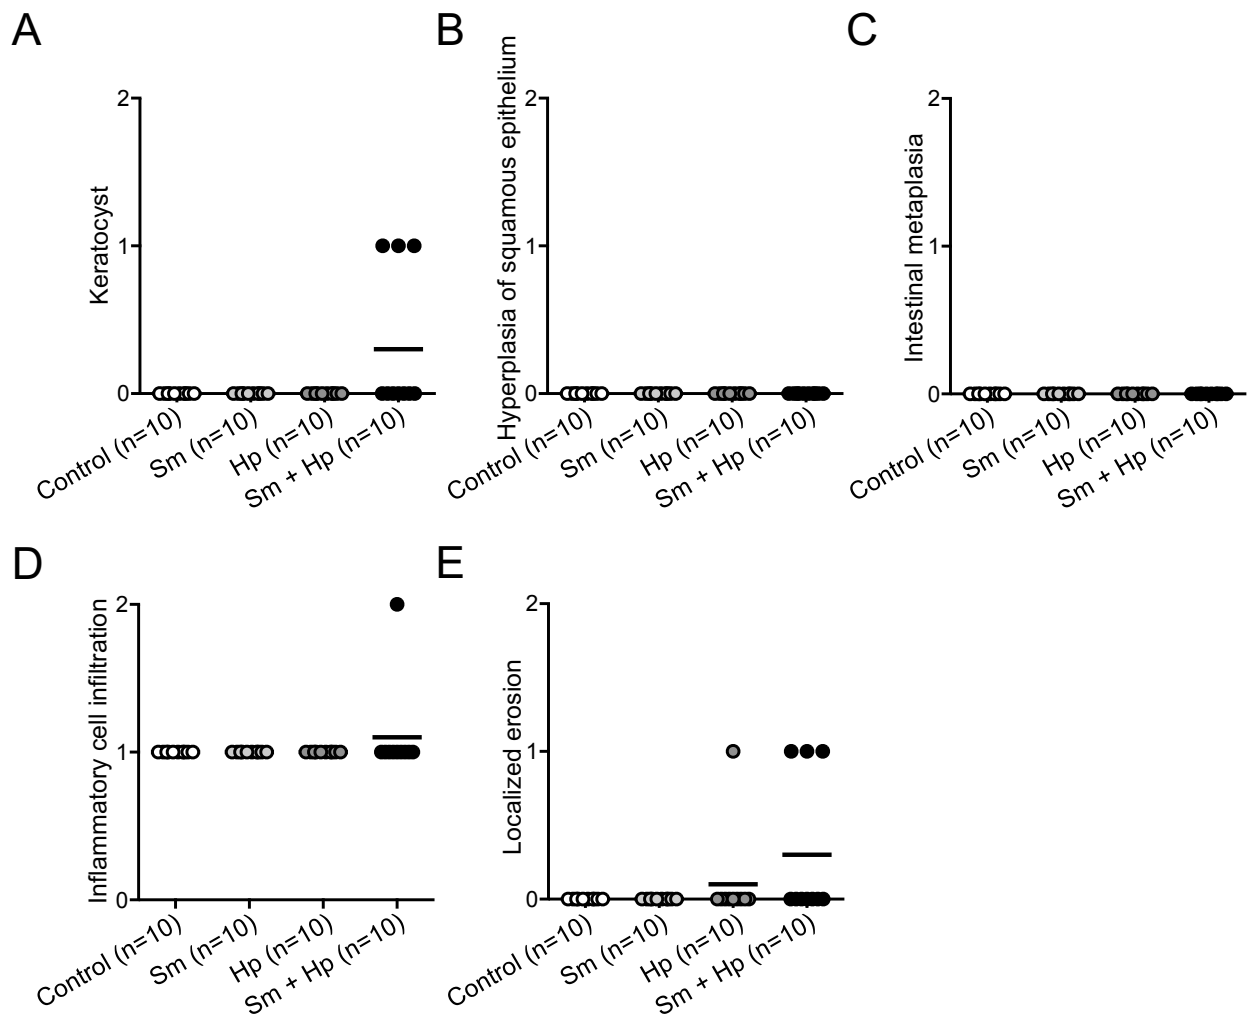

**Supplementary Figure 1** Histopathological scores of (a) keratocyst, (b) hyperplasia of squamous epithelium, (c) intestinal metaplasia, (d) inflammatory cell infiltration, and (e) localized erosion. Each closed circle represents the deflection of gastric mucosa for each rat. Horizontal bars indicate the mean value for the groups. Sm, *S. mutans*; Hp, *H. pylori*.

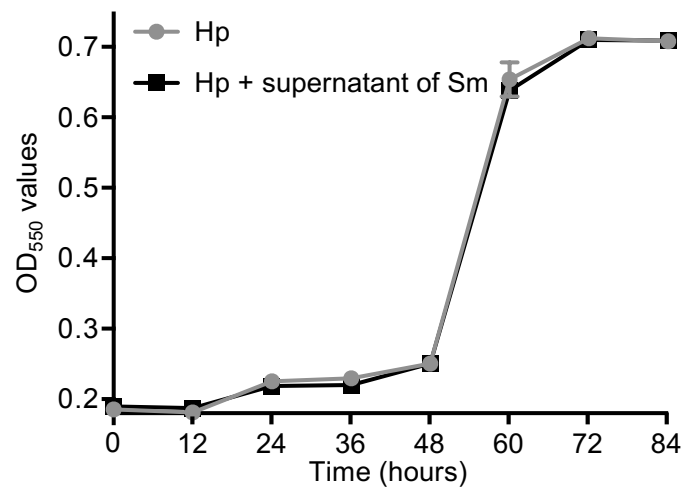

**Supplementary Figure 2** Bacterial growth of *H. pylori* at multiple time points. Sm, *S. mutans*; Hp, *H. pylori*.

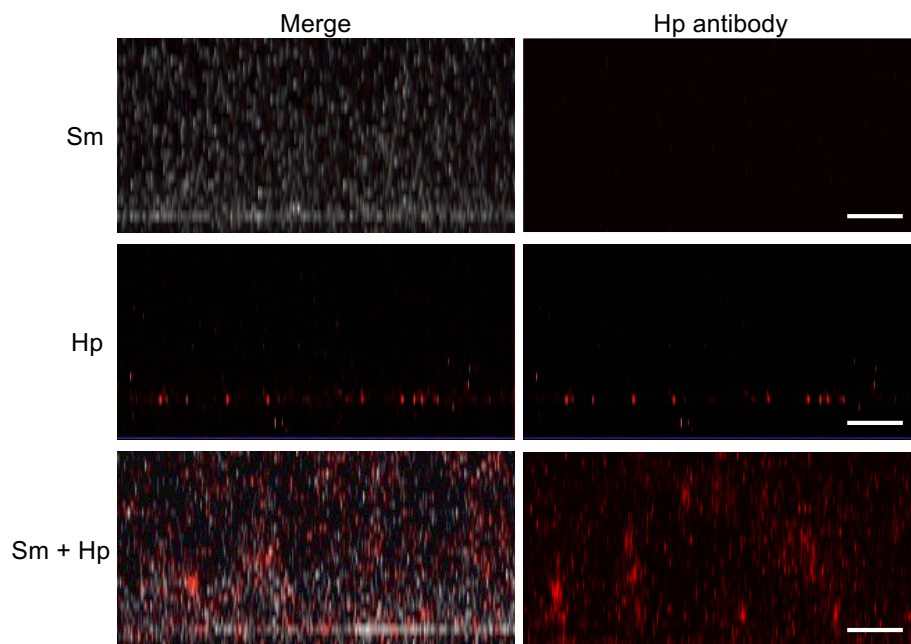

**Supplementary Figure 3** Representative images of biofilm thickness, captured using confocal scanning laser microscopy. *S. mutans* and *H. pylori* cells are stained white and red, respectively. Bars = 20  $\mu\text{m}$ . Sm, *S. mutans*; Hp, *H. pylori*.
